# Supplementary material for: Annotation of the Turnera subulata (Passifloraceae) Draft Genome Reveals the S-Locus Evolved after the Divergence of Turneroideae from Passifloroideae in a Stepwise Manner
Source: MDPI journal article supplement (doi:10.3390/plants12020286), 2023-01-07
Supplement: s1 [file s1]

**Supplementary Table S1.** OrthoVenn2 generated clusters containing *S*-genes

| <i>S</i> -gene | Other proteins                   | Associated enriched GO term              |
|----------------|----------------------------------|------------------------------------------|
| <i>BAHD</i>    | Ricinus: 29929.m004719           | GO:0009820; P:alkaloid metabolic process |
|                | Ricinus: 29929.m004743           |                                          |
|                | Manihot: MANES_12G016900         |                                          |
|                | Populus: POPTR_010G056300v3      |                                          |
|                | Populus: POPTR_010G056400v3      |                                          |
|                | Passiflora: CDS_3194772138_12614 |                                          |
| <i>SPH1</i>    | Passiflora: CDS_3194753076_23485 | GO:0060320; P:rejection of self-pollen   |
|                | Turnera: Tsubulata_042462-RA     |                                          |
|                | Turnera: Tsubulata_19640-RA      |                                          |
|                | Turnera: Tsubulata_19645-RA      |                                          |
|                | Turnera: Tsubulata_19636-RA      |                                          |
|                | Turnera: Tsubulata_19634-RA      |                                          |
|                | Turnera: Tsubulata_19635-RA      |                                          |
|                | Turnera: Tsubulata_19637-RA      |                                          |

**Supplementary Table S2.** Updated nomenclature for previously identified differentially expressed genes [16].

| 2020 Name        | Current Name        | Family | Young Stamen | Young pistil | Mature stamen | Mature pistil | Arabidopsis homolog |
|------------------|---------------------|--------|--------------|--------------|---------------|---------------|---------------------|
| <i>TsBAHD</i>    | <i>TsBAHD</i>       | BAHD   | -            | Enriched     | -             | Enriched      | AT5G47980           |
| Tsub_00000135-RA | Tsubulata_000216-RA | BAHD   | Enriched     | -            | -             | -             | AT5G17540           |
| Tsub_00011564-RA | Tsubulata_019412-RA | BAHD   | -            | -            | -             | Enriched      | AT3G29590           |
| Tsub_00021993-RA | Tsubulata_036487-RA | BAHD   | -            | -            | -             | Depleted      | AT5G23940           |
| Tsub_00022067-RA | Tsubulata_036624-RA | BAHD   | -            | Depleted     | -             | -             | AT3G26040           |
| Tsub_00024268-RA | Tsubulata_040244-RA | BAHD   | -            | -            | -             | Depleted      | AT2G25150           |
| Tsub_00027864-RA | Tsubulata_046551-RA | BAHD   | Depleted     | -            | -             | -             | AT3G50280           |
| <i>TsSPH1</i>    | <i>TsSPH1</i>       | SPH    | Enriched     | -            | Enriched      | -             | AT4G16295           |
| Tsub_00002485-RA | Tsubulata_004235-RA | SPH    | -            | -            | -             | Depleted      | AT5G38700           |
| Tsub_00003537-RA | Tsubulata_006124-RA | SPH    | Enriched     | -            | Enriched      | -             | AT4G16295           |
| Tsub_00011356-RA | Tsubulata_019039-RA | SPH    | Enriched     | -            | -             | -             | AT4G16295           |
| Tsub_00020676-RA | Tsubulata_034353-RA | YUCCA  | Depleted     | -            | -             | -             | AT4G13260           |
| <i>TsYUC6</i>    | <i>TsYUC6</i>       | YUCCA  | Enriched     | -            | Enriched      | -             | AT5G25620           |

**Supplementary Table S3.** CoGE:BLAST [105] identified paralogs in *Passiflora organensis* and *Passiflora edulis*.

|      | <i>T. subulata</i>  |                        |          | <i>P. organensis</i> |                  |           | <i>P. edulis</i> |         |  |
|------|---------------------|------------------------|----------|----------------------|------------------|-----------|------------------|---------|--|
|      |                     | Scaffold               | Position | E-value              |                  | Scaffold  | Position         | E-value |  |
| BAHD | TsBAHD              | scaffold194_size94437  | 17202    | 0                    | GWHAZTM000000001 | 179143548 | 0                |         |  |
|      | Tsubulata_042462-RA | scaffold194_size94437  | 17202    | 2E-172               | GWHAZTM000000001 | 179143548 | 2E-175           |         |  |
|      | Tsubulata_042465-RA | scaffold194_size94437  | 17202    | 0                    | GWHAZTM000000001 | 179143548 | 0                |         |  |
| SPH  | TsSPH1              | scaffold4_size11498481 | 11471255 | 4E-49                | GWHANWG000000004 | 81883317  | 3E-46            |         |  |
|      | Tsubulata_019634-RA | scaffold4_size11498481 | 11454556 | 6E-43                | GWHANWG000000004 | 81883287  | 6E-43            |         |  |
|      | Tsubulata_019635-RA | scaffold22_size2164848 | 1019431  | 7E-43                | GWHANWG000000004 | 81883323  | 7E-44            |         |  |
|      | Tsubulata_019636-RA | scaffold4_size11498481 | 11454592 | 6E-45                | GWHANWG000000004 | 81883317  | 2E-45            |         |  |
|      | Tsubulata_019637-RA | scaffold4_size11498481 | 11454556 | 3E-16                | GWHANWG000000004 | 81883287  | 1E-15            |         |  |
|      | Tsubulata_019640-RA | scaffold4_size11498481 | 11471123 | 3E-31                | GWHANWG000000004 | 81883188  | 3E-30            |         |  |
|      | Tsubulata_019645-RA | scaffold4_size11498481 | 11471123 | 3E-30                | GWHANWG000000004 | 78962794  | 4E-30            |         |  |
| YUC  | TsYUC6              | scaffold8_size8616334  | 3241333  | 3E-138               | GWHAZTM000000001 | 198171934 | 5E-124           |         |  |
|      | Tsubulata_012066-RA | scaffold8_size8616334  | 3241333  | 1E-144               | GWHAZTM000000001 | 198171979 | 1E-130           |         |  |
|      | Tsubulata_013511-RA | scaffold8_size8616334  | 3241333  | 5E-153               | GWHAZTM000000009 | 4433551   | 7E-142           |         |  |

**Supplementary Table S4.** Members of the *BAHD*, *SPH*, and *YUCCA* families residing on the same scaffold.

|                 | <i>BAHD</i>                                                       | <i>SPH</i>          | <i>YUCCA</i>    |
|-----------------|-------------------------------------------------------------------|---------------------|-----------------|
| scf62_sz374423  | Tsubulata_002993-RA<br>Tsubulata_002996-RA<br>Tsubulata_003969-RA | Tsubulata_003003-RA | -               |
| scf91_sz346335  | Tsubulata_003973-RA<br>Tsubulata_003976-RA                        | Tsubulata_003975-RA | -               |
| scf5190_sz28544 | Tsubulata_047626-RA                                               | Tsubulata_047624-RA | -               |
| scf1941_sz87093 | -                                                                 | <i>TsSPH1</i> *     | <i>TsYUC6</i> * |

\* *S*-genes

**Supplementary Table S5.** *Cis*-regulatory Element Motifs in the 1kb upstream region of *TsBAHD* and Tsubulata\_042462-RA

| <i>Cis</i> -element  | Description (where applicable)                              | TsBAHD | Tsubulata_042462-RA |
|----------------------|-------------------------------------------------------------|--------|---------------------|
| ABRE                 | ABA responsive element                                      | 3      | 0                   |
| AE-Box               | Light responsive element                                    | 1      | 0                   |
| ARE                  | anaerobic induction                                         | 3      | 1                   |
| AT~TATA-box          |                                                             | 1      | 3                   |
| AuxRR-core           | Auxin response                                              | 0      | 1                   |
| Box 4                | Light responsive element                                    | 4      | 0                   |
| CAAT-box             | Common <i>cis</i> -element in promoter and enhancer regions | 12     | 16                  |
| CCAAT-box            | MYBHv1 binding site                                         | 0      | 1                   |
| CGTCA-motif          | MeJA-responsiveness                                         | 1      | 0                   |
| ERE                  |                                                             | 1      | 0                   |
| G-Box                | Light responsive element                                    | 3      | 0                   |
| GC-motif             | Anoxic specific induction                                   | 1      | 0                   |
| MBS                  | MYB binding site involved in drought-inducibility           | 1      | 0                   |
| GT1-motif            | Light responsive element                                    | 0      | 1                   |
| I-Box                | Light responsive element                                    | 0      | 1                   |
| MYB                  |                                                             | 0      | 3                   |
| MYB recognition site |                                                             | 0      | 1                   |
| MYB like sequence    |                                                             | 0      | 2                   |
| MYC                  |                                                             | 1      | 2                   |
| Myb                  |                                                             | 2      | 0                   |
| O2-site              | Zein metabolism regulation                                  | 1      | 2                   |
| STRE                 |                                                             | 3      | 2                   |
| Sp1                  | Light responsive element                                    | 1      | 0                   |
| TATA                 |                                                             | 2      | 0                   |
| TATA-box             |                                                             | 23     | 0                   |
| TCA-element          | Salicylic acid response                                     | 2      | 11                  |
| TCT-motif            | Light response                                              | 1      | 1                   |
| TGACG-motif          | MeJA response                                               | 1      | 0                   |
| Unnamed_2            | <i>Zea mays</i> identified element                          | 0      | 1                   |
| Unnamed__4           | <i>Petroselinum hortense</i> identified element             | 13     | 3                   |
| WRE3                 |                                                             | 0      | 1                   |
| WUN-Motif            | Wound-responsive element                                    | 0      | 1                   |
| as-1                 |                                                             | 1      | 0                   |
| dOCT                 |                                                             | 1      | 0                   |

**Supplementary Table S6.** Information regarding library construction.

|                             | <b>Library 1</b>   | <b>Library 2</b>             | <b>Library 3</b>          |
|-----------------------------|--------------------|------------------------------|---------------------------|
| Method                      | HiSeq Rapid PE250  | Illumina HiSeq<br>2500 PE125 | HiSeq Rapid PE125         |
| Total paired-end reads      | 15734190           | 279876652                    | 72685390                  |
| Read average quality        |                    | 34                           |                           |
| Library                     | Nexetera mate pair |                              | PCR-free Illumina shotgun |
| Library average insert size | c. 5kb             |                              | c. 450bp                  |

**Supplementary Table S7.** ABI Conditions for RT-qPCR

| <b>Stage</b>        | <b>Temperature</b> | <b>Time</b> |
|---------------------|--------------------|-------------|
| Holding             | 95.0 °C            | 10:00       |
| Cycling (40 cycles) | 95.0 °C            | 00:15       |
|                     | 61.5 °C            | 00:30       |
| Melt Curve          |                    |             |
| Step 1              | 95.0 °C 100%       | 00:15       |
| Step 2              | 61.5 °C 1%         | 01:00       |
| Step 3              | 95.0 °C 100%       | 00:15       |
| Step 4              | 61.5 °C            | 00:15       |

**Supplementary Table S8.** Primers used in RT-qPCR

| <b>Transcript</b>   | <b>Forward (5' → 3')</b> | <b>Reverse (5' → 3')</b> |
|---------------------|--------------------------|--------------------------|
| Tsubulata_002095-RA | GAAGTGCTCATTGTCGGTG      | AGGGCATGTAAGGAAGCTG      |
| Tsubulata_016922-RA | ACATGTTTCAACACTCAGGTCA   | CAAGGATAACGAATGGGACA     |
| Tsubulata_033464-RA | GTTCCCTTCTTGATCCTTGAG    | AGGAGGGAATGGCATGT        |
| Tsubulata_023613-RA | AGAAAGAAATCCAGGTACTTCCA  | TGCTTAGGCAATCCACTAACA    |
| Tsubulata_035395-RA | CCACCATTGGAGAGTCAGA      | CGTTAAACTAATGTCGGTTGCT   |
| Tsubulata_012066-RA | TGCCAAAAGAGTAGCCGA       | ACCTCTTCGAATATCGCATG     |
| Tsubulata_013511-RA | TGGACTGCTTGAGAGAAATAGAA  | AGAGGCCACGCAGCT          |
| Tsubulata_001512-RA | GAAGCACTGTGAATTATTGGCT   | TTCATTCTTACTCGCAGCTAACT  |
| Tsubulata_025569-RA | ACGGGGAAGACCTACCAG       | AGCAGTTTTAGACCAATGTAAACC |
| Tsubulata_012068-RA | CAAGGCCAATGATTTTGC       | TCCATTGATCTGCCACATC      |
| Tsubulata_012030-RA | CTCTCCCAAATTTGGCAAG      | ACCGTTAACCCAAATGCAC      |
| Tsubulata_034353-RA | TCGCTACGGGCTACAAAAGCAC   | CGTTAAACTAATGTCGGTTGCT   |
| <i>TsYUC6</i>       | GATGGATTCCCTAGAGGCAC     | CACCTTCCGATATCTTCTGCT    |
| <i>β-tubulin</i>    | AGATTTTCCGACCCGACA       | GCAATCACAATCTCGGCT       |
| <i>UEVD1</i>        | AGCCAGCCAAGTCGTCT        | CATCGTCCATTCCATAGCTTAC   |

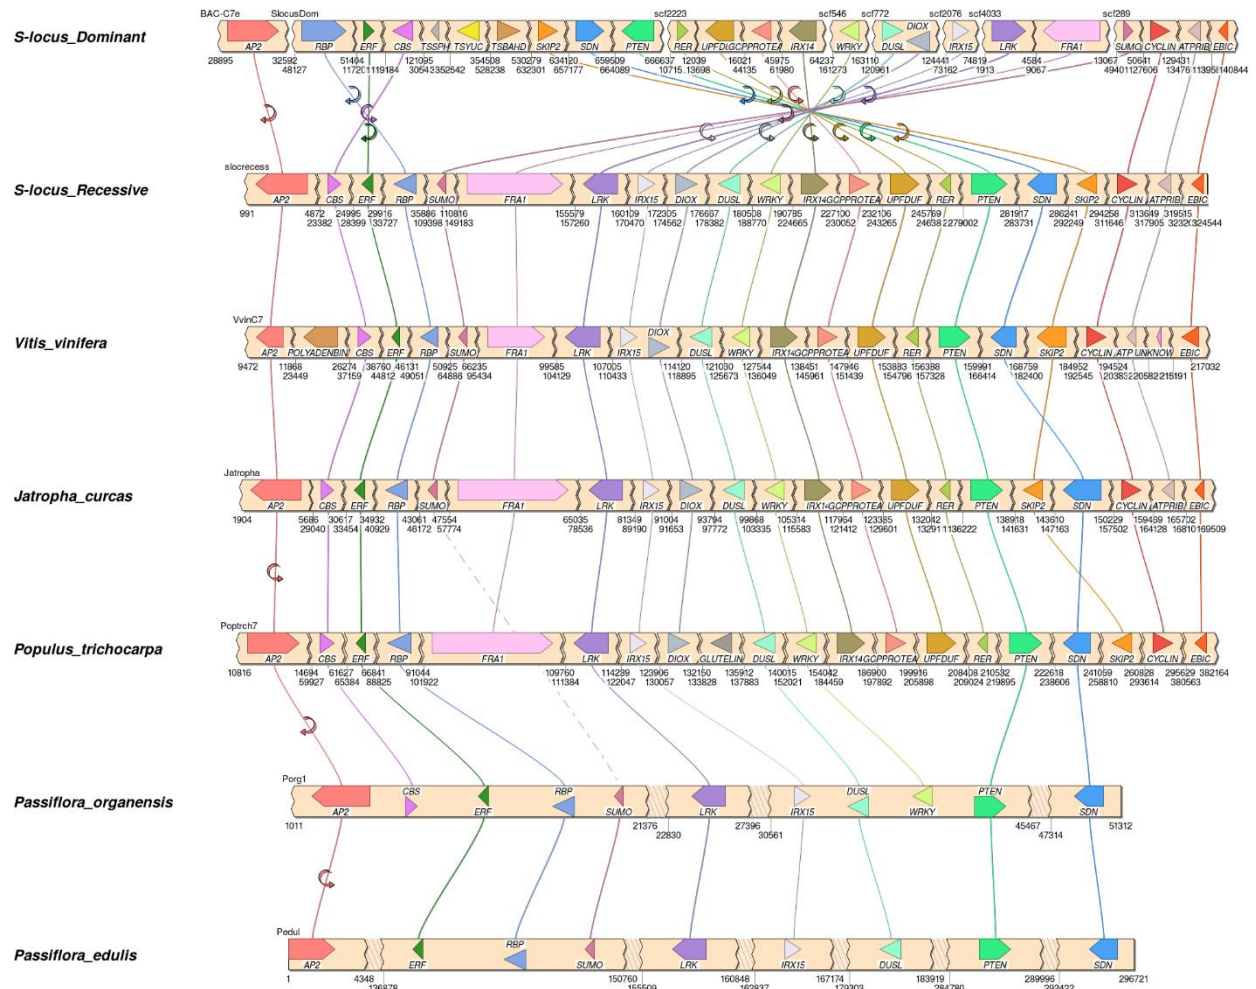

**Supplemental Figure S1.** Synteny of the region flanking the *S*-locus with closely related species. We used SimpleSynteny [108] to compare the *S*-locus haplotypes of *Turnera subulata* to scaffolds from the genomes of five species of Malpighiales including *Vitis vinifera*, *Jatropha curcas*, *Populus trichocarpa*, *Passiflora organensis* and *Passiflora edulis*. The recessive *S*-locus of *Turnera subulata* shows remarkable collinearity with scaffolds of *Vitis vinifera*, *Jatropha curcas*, and *Populus trichocarpa* while dominant *S*-locus haplotype possess a number of rearrangements as previously reported [3]. The dominant haplotype is comprised of 8 scaffolds, and the orientation and order of some scaffolds isn't known with certainty. Interestingly, scaffolds from both *Passiflora organensis* and *Passiflora edulis* appear to have lost a number of genes from this region, relative to the other Malpighiales.

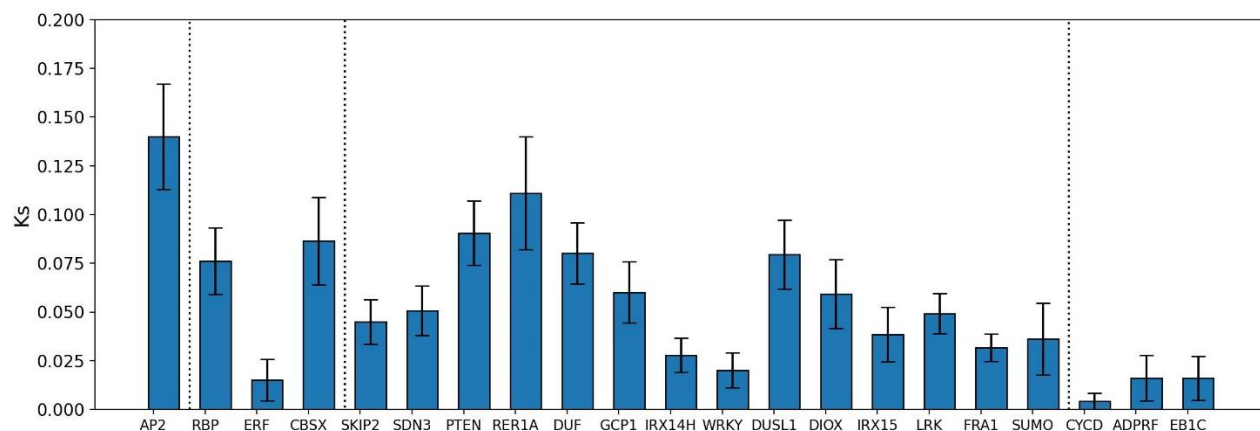

**Supplemental Figure S2.** Distribution of synonymous substitution rates of genes flanking the *S*-locus. Distribution of synonymous substitution rates,  $K_s$ , for genes on the *S*-locus haplotypes other than the 3 hemizygous genes. Dashed lines represent the points of inversion. Substitution rates were estimated as described in the methods for the comparison of paralogs.

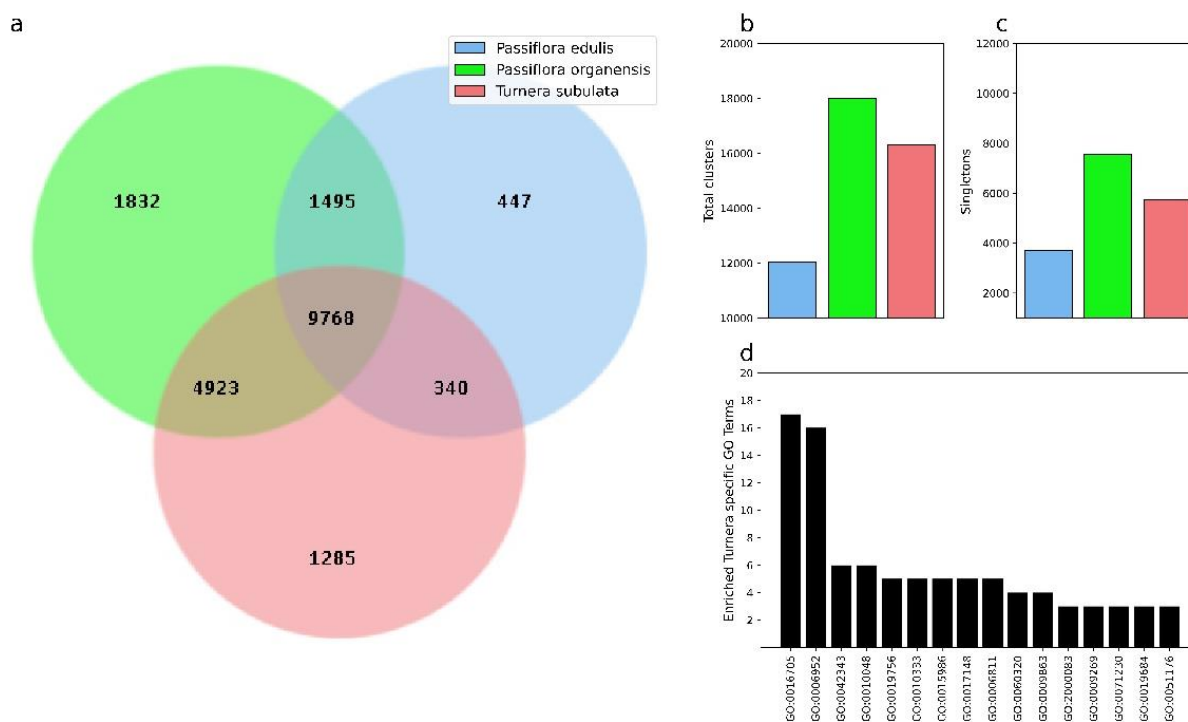

**Supplementary Figure S3.** OrthoVenn2 results of the Turneroideae and Passifloroideae comparison. Venn diagrams showing orthologous groups shared between the three species or proteins that were specific to one species (a). Total number of clusters for each species including both orthologous and paralogous clusters (b). Total singletons for each species, these represent proteins that are predicted to not share a similar function with other orthologs or paralogs (c). Enriched GO terms for *Turnera* specific paralogs (d).

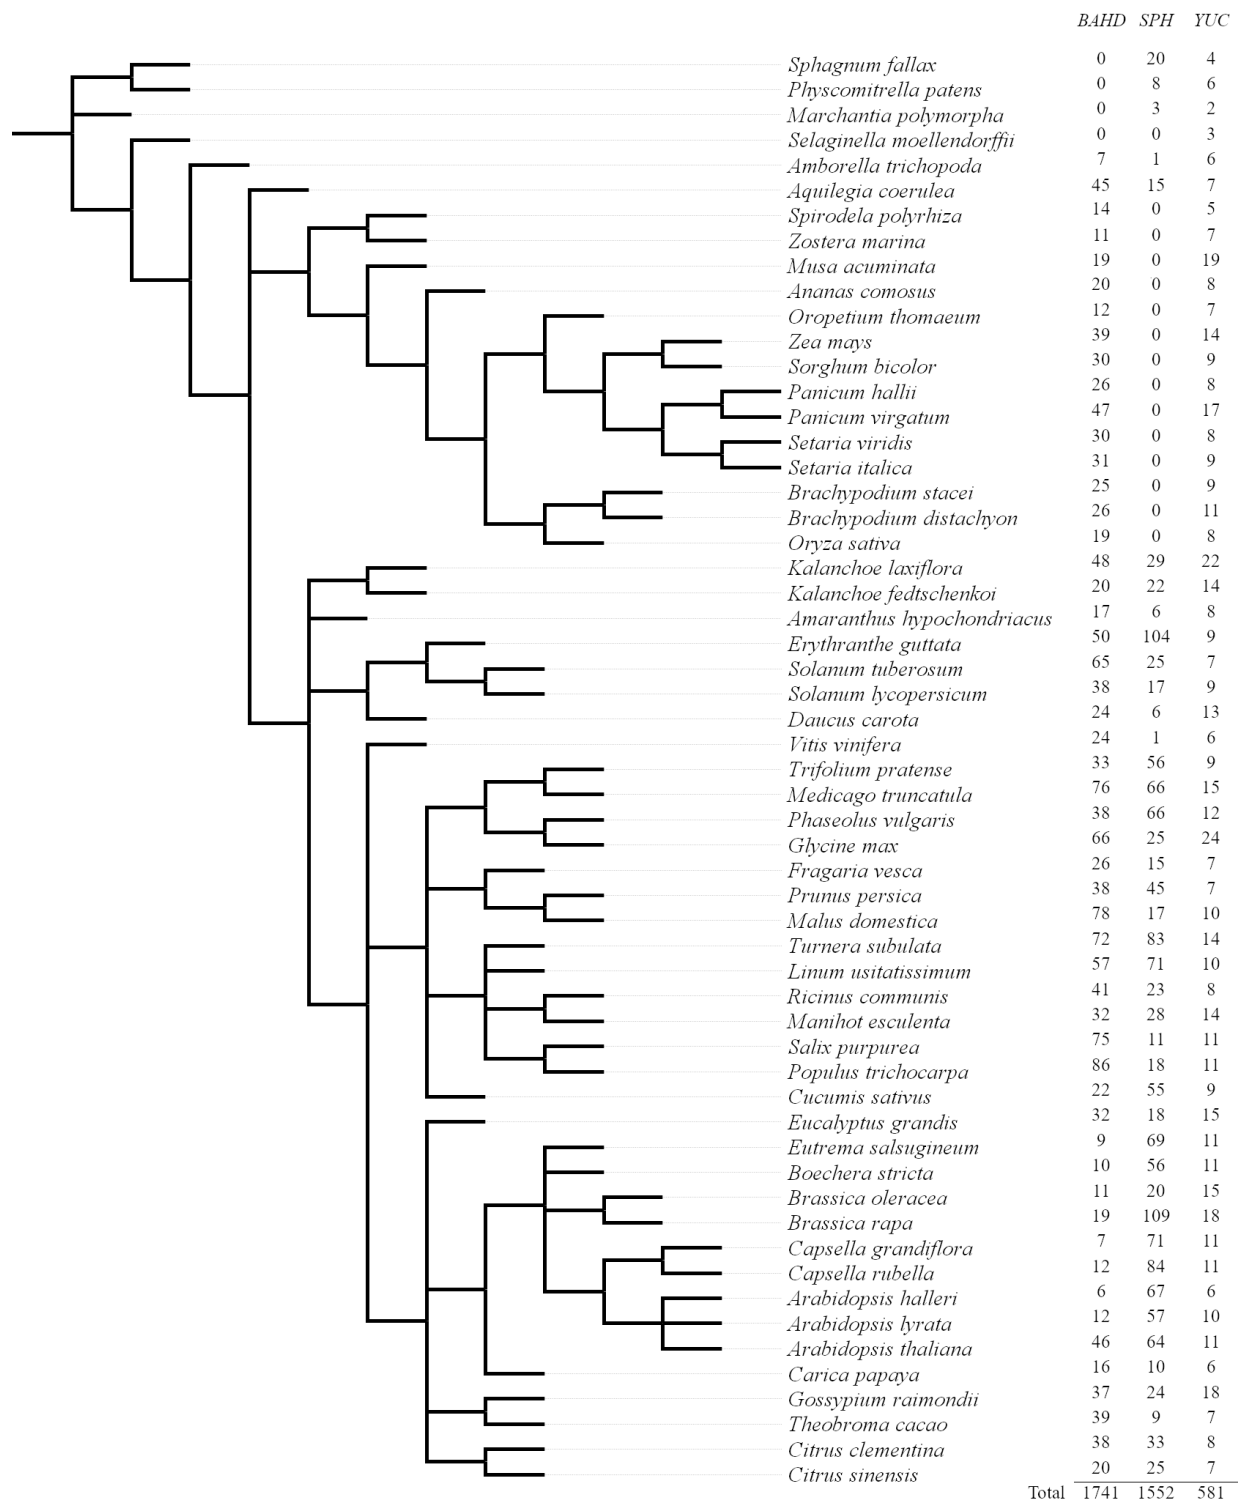

**Supplemental Figure S4.** NCBI generated common tree of the species used across the three analyses. Total members of the three gene families are accounted for at the bottom of the image.

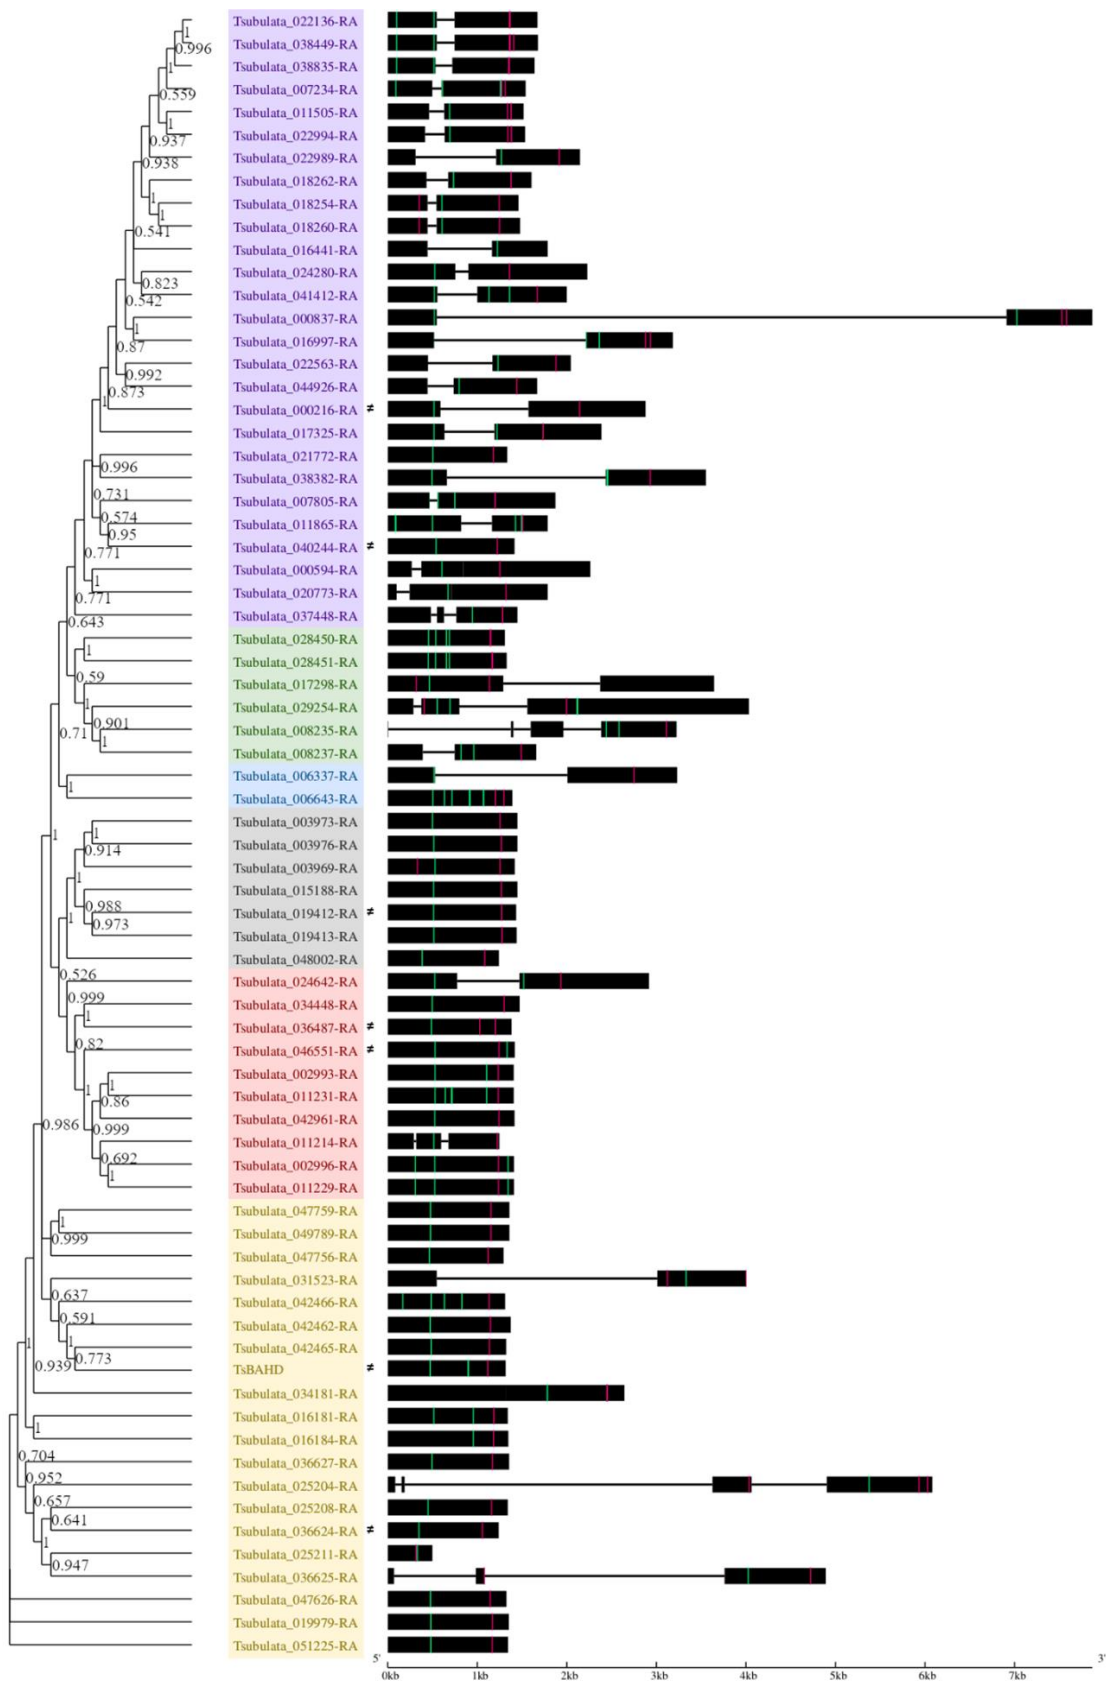



**Supplemental Figure S6.** Phylogenetic relationship of the putative *BAHD* family members *Turnera subulata*.  $\neq$  marks genes that were previously identified as differentially expressed [16]. A comprehensive list of differentially expressed *BAHD*s can be found in Supplementary Table S2. Figure was generated using GSDS (V-2.0) [109]

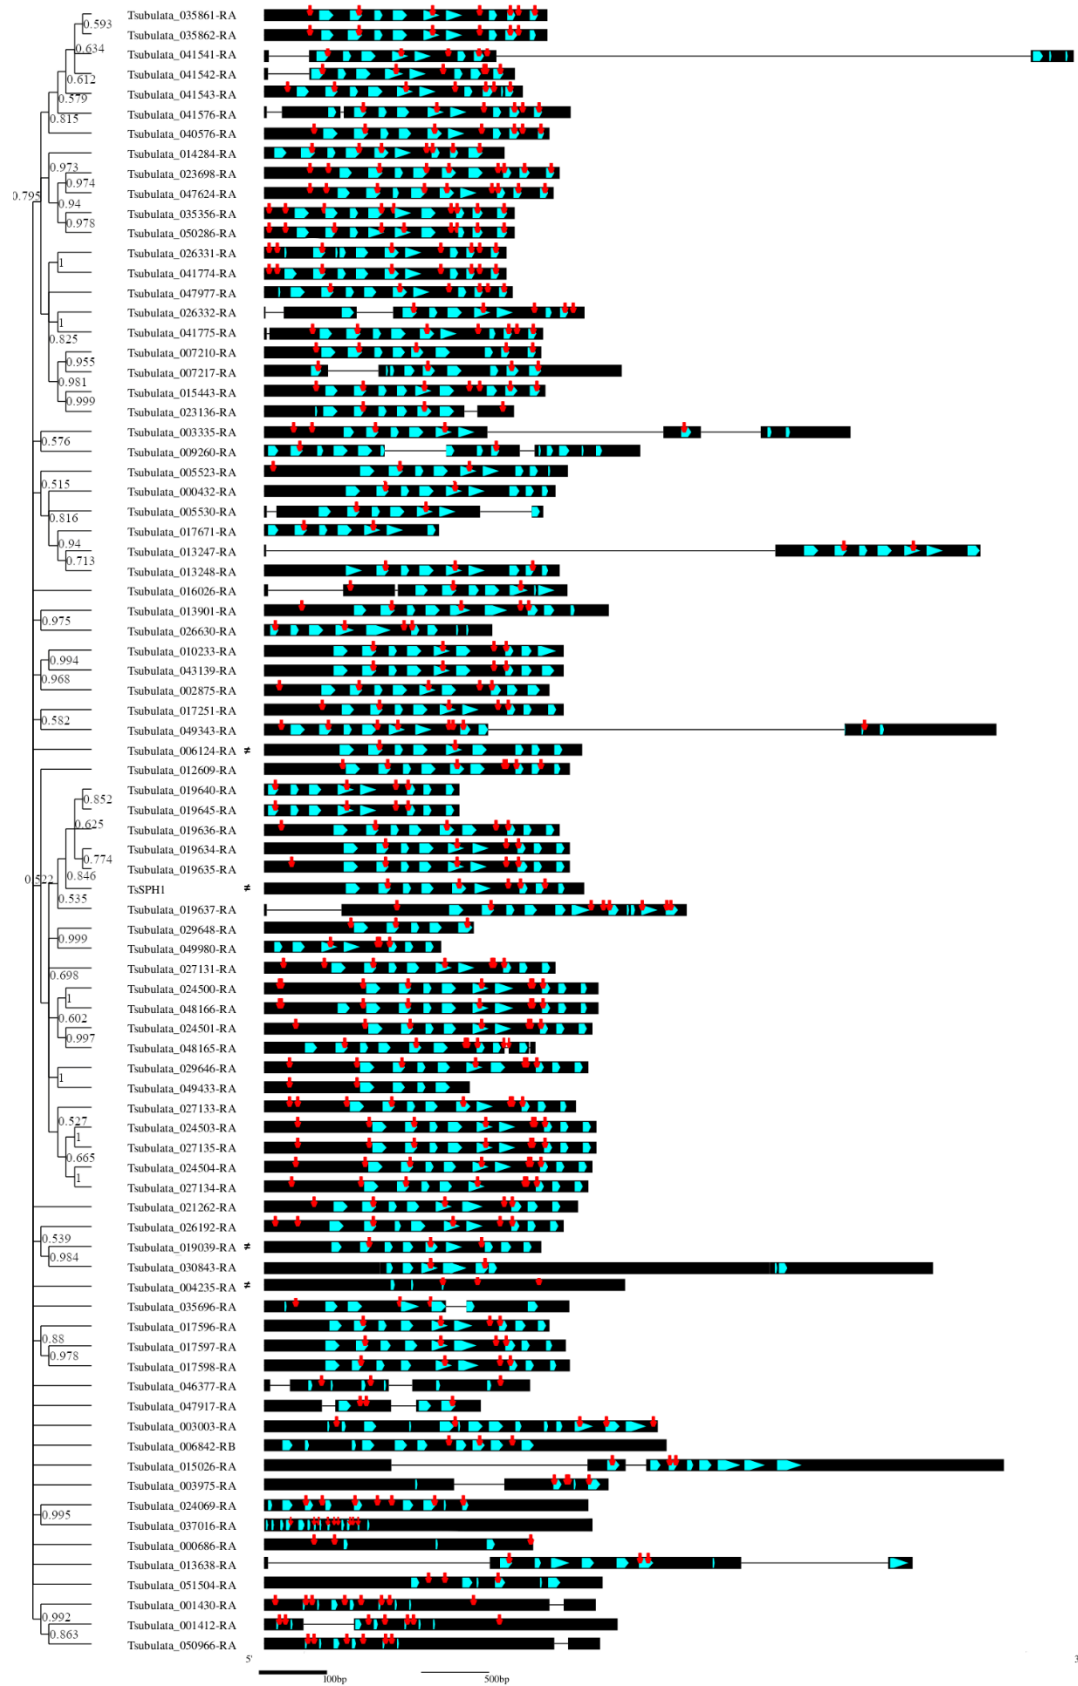

**Supplemental Figure S8.** Phylogenetic relationship of the putative *SPH* family members in *Turnera subulata*. ≠ marks genes that were previously identified as differentially expressed [16]. A comprehensive list of differentially expressed *SPHs* can be found in Supplementary Table S2. Figure was generated using GSDS (v.2.0) [109].

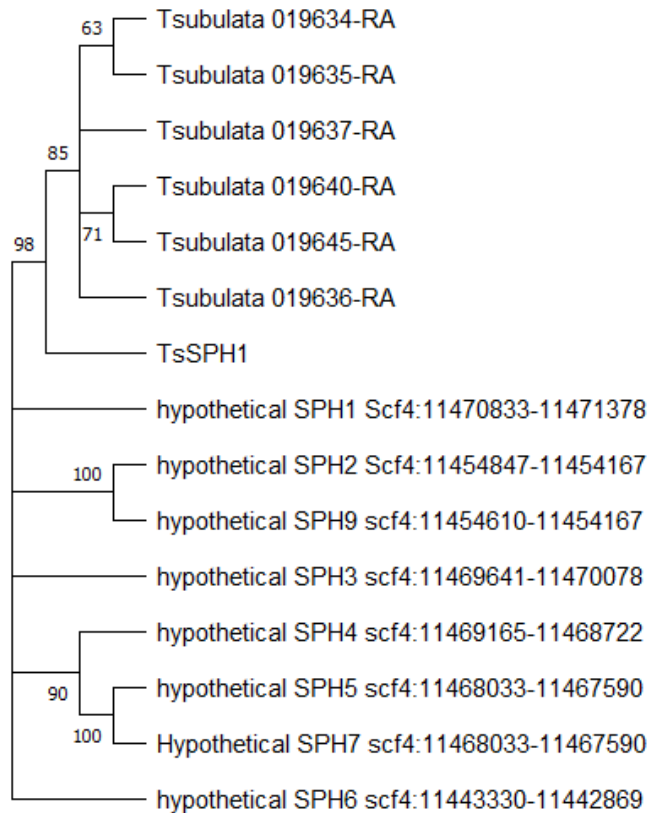

**Supplemental Figure S9.** Phylogenetic analysis of the *Passiflora organensis* and *Turnera subulata* *SPHs*. These represent orthologs that hypothetically reside on an orthologous chromosome. *Turnera subulata* *SPHs* can be found on scaffold 850\_149123; *Passiflora organensis* *SPHs* can be found on scaffold 4. Nomenclature of *Passiflora organensis* genes was arbitrarily assigned. Generated using MEGA11 [30]. Values at nodes represent proportions from 1000 bootstrap replicates.

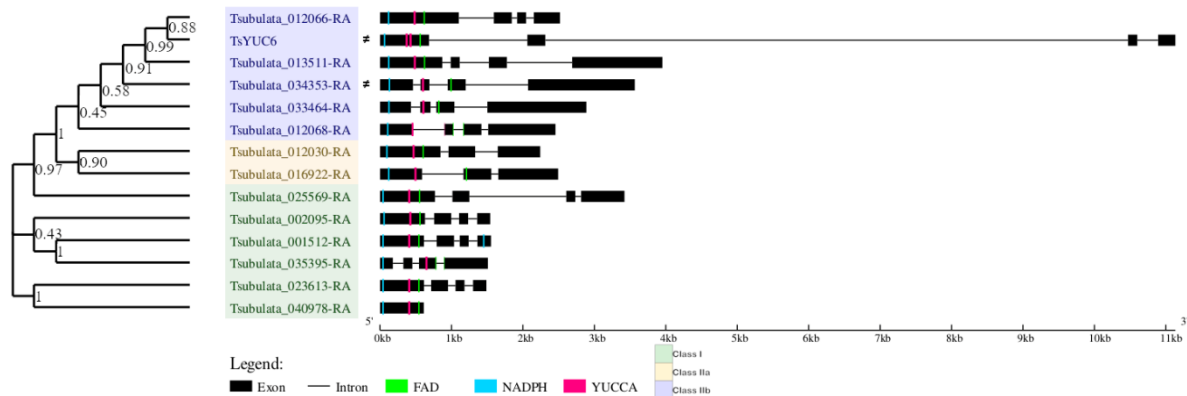

**Supplemental Figure S11.** Phylogenetic relationship of the putative *YUCCA* family members in *Turnera subulata*.  $\neq$  marks genes that were previously identified as differentially expressed [16]. A comprehensive list of differentially expressed *YUCCAs* can be found in Supplementary Table S2. Figure was generated using GSDS (v.2.0) [109]

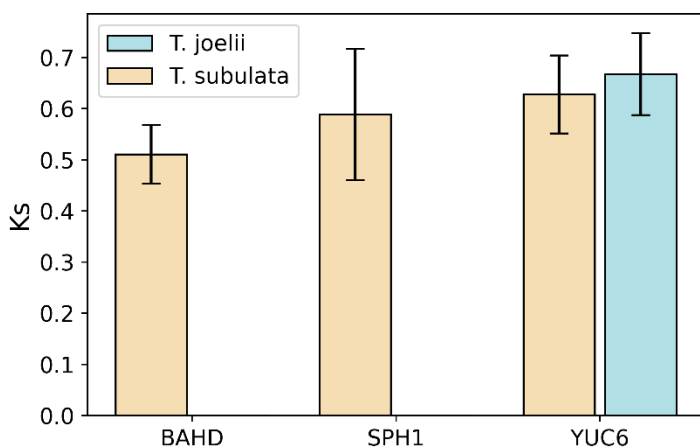

**Supplemental Figure S12.** Synonymous substitution rates ( $K_s$ ) for the three *S*-genes relative to their closest paralogs (*TsBAHD* vs Tsubulata\_042462-RA; *TsSPH1* vs Tsubulata\_19640-RA; *TsYUC6* vs Tsubulata\_012066-RA; *TjYUC6* vs OasesvelvLoc16468t6 (GenBank: OP886701) as calculated using methods outlined in Gutiérrez-Valencia *et al.*, 2022. Error bars represent the standard errors.

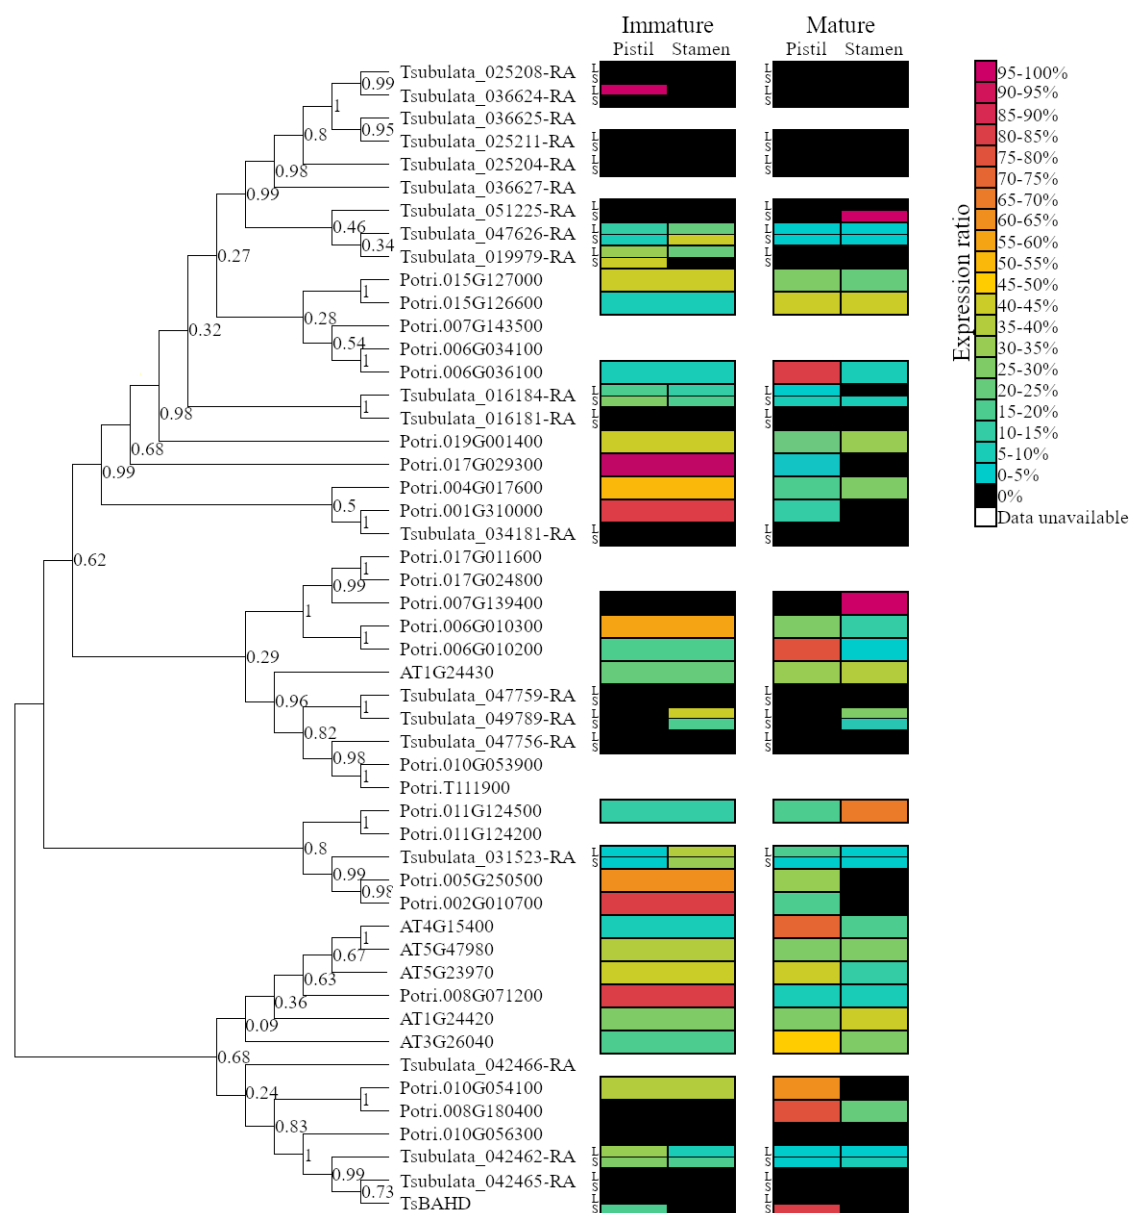

**Supplementary Figure S13:** Comparison of the expression of the IIIA subclade of the *BAHD* family in the developing flowers of *Arabidopsis* (stage 9, stage 12 carpel and stamen), *Populus* (samples BESC423.ZL, GW9592.ZK, and Early dormant bud), and *Turnera* (PRJNA589060). Tree represents the maximum likelihood estimate of relationship including bootstrap values. Expression patterns were normalized within species but not across species. Expression patterns were normalized for individual genes not across genes.

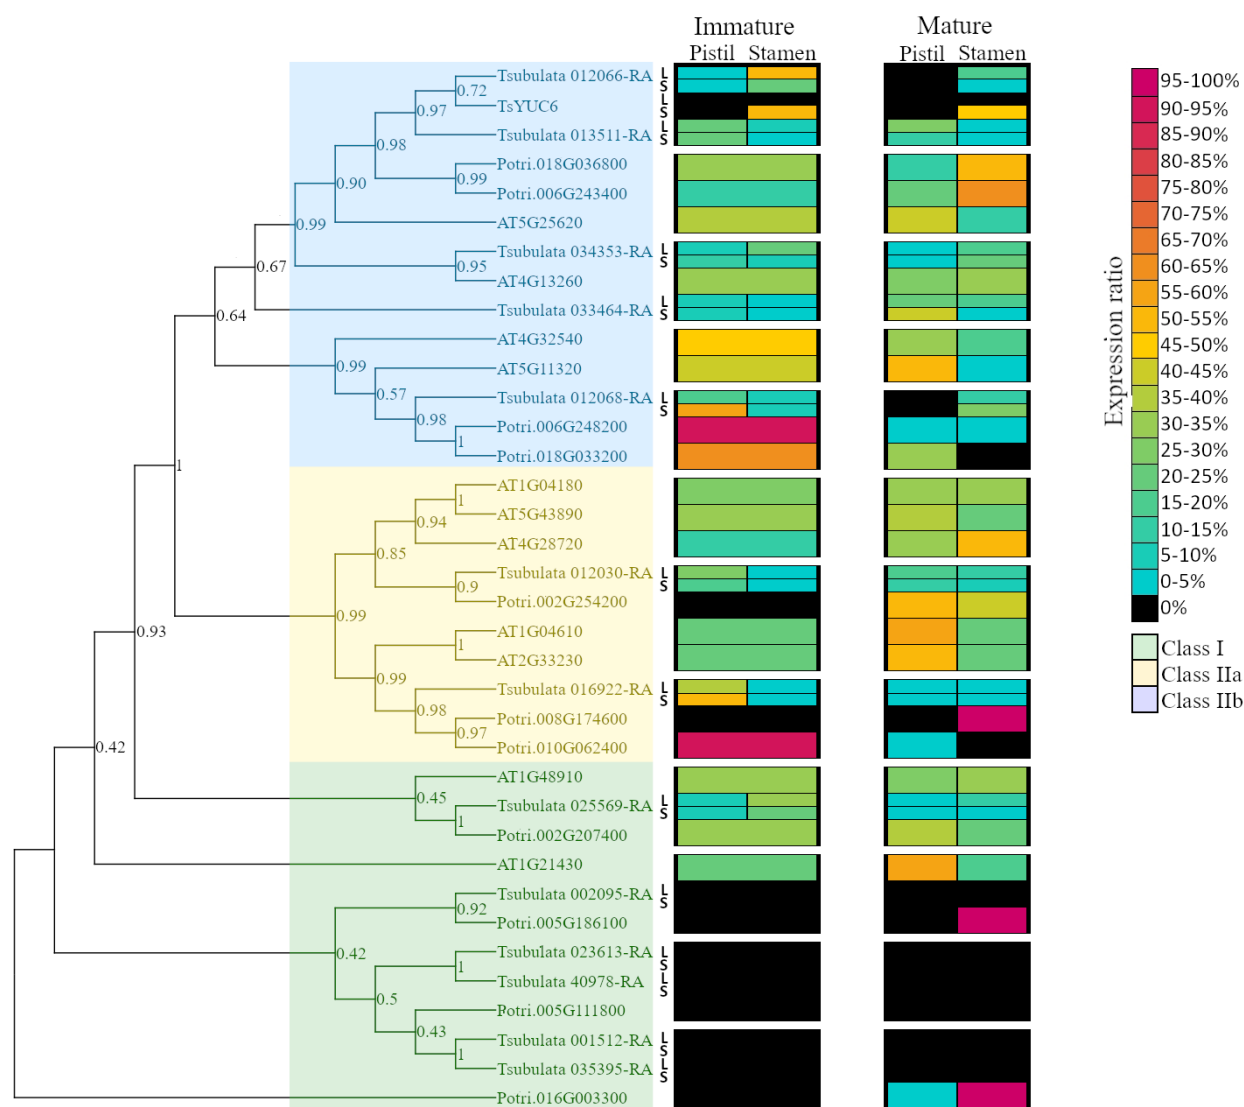

**Supplementary Figure S14:** Comparison of the expression of the *YUCCA* family in the developing flowers of *Arabidopsis*, *Populus*, and *Turnera*. Expression patterns were normalized for individual genes not across genes.
