# Supplementary figures and images for: Annotation of the Turnera subulata (Passifloraceae) Draft Genome Reveals the S-Locus Evolved after the Divergence of Turneroideae from Passifloroideae in a Stepwise Manner
Source: MDPI journal article supplement (doi:10.3390/plants12020286), 2023-01-07

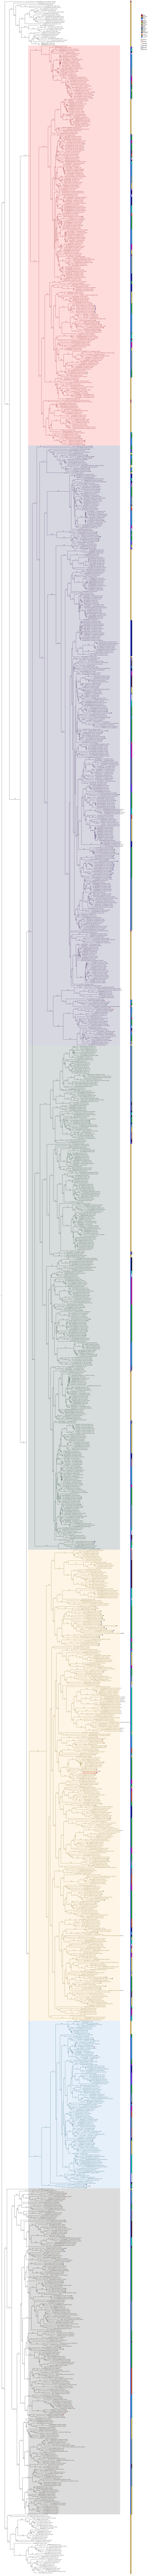

Supplement: s1 [file s1]
